# Supplementary figures and images for: Genetic deletion of microRNA biogenesis in muscle cells reveals a hierarchical non-clustered network that controls focal adhesion signaling during muscle regeneration
Source: PubMed Central journal article supplement — Mol Metab. 2020 Mar 5;36:100967. doi: 10.1016/j.molmet.2020.02.010 (PMC7139120; doi:10.1016/j.molmet.2020.02.010), 2020-03-05

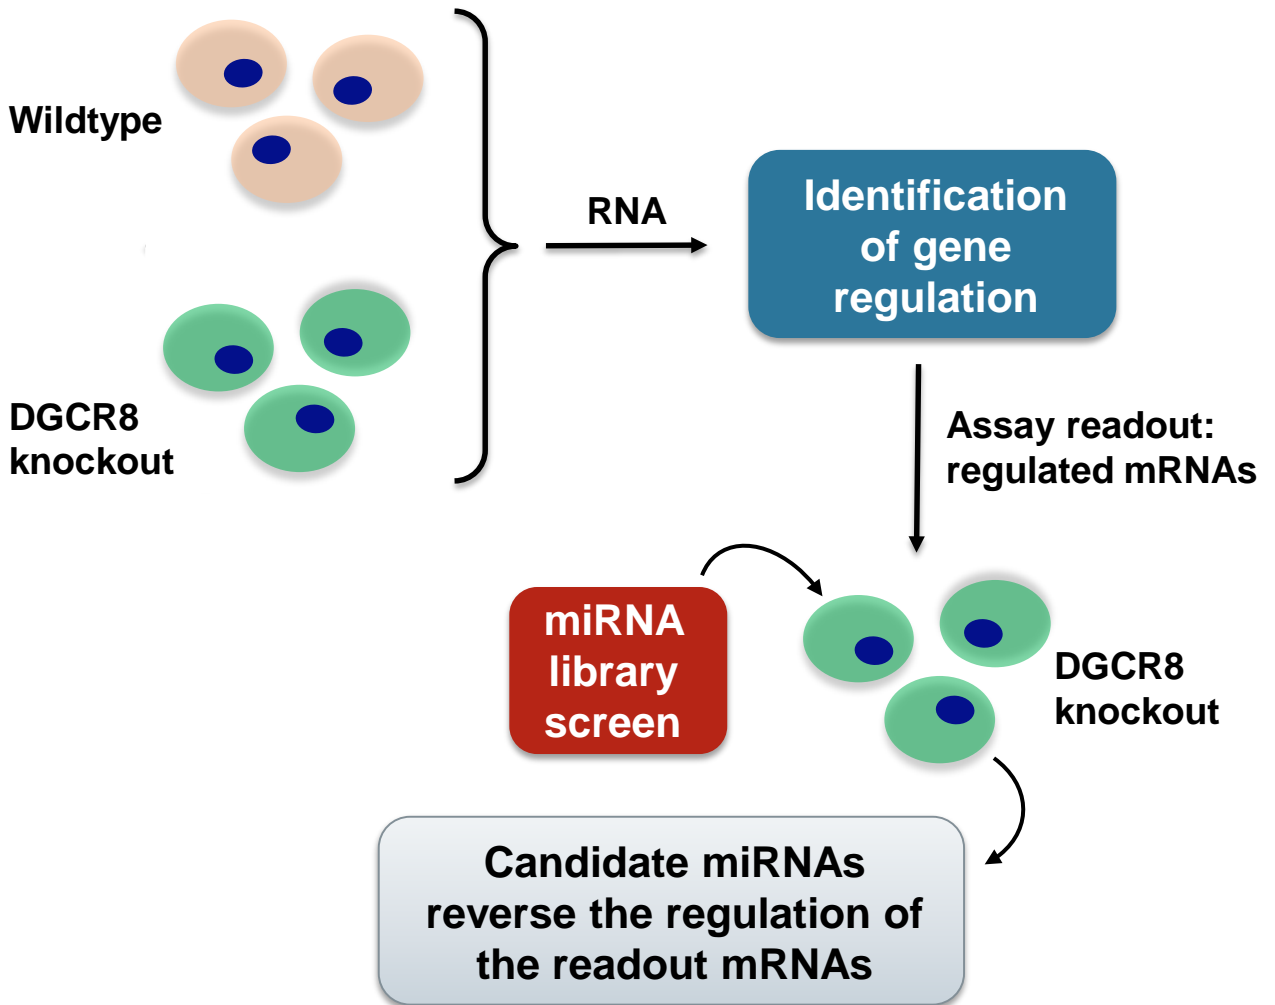

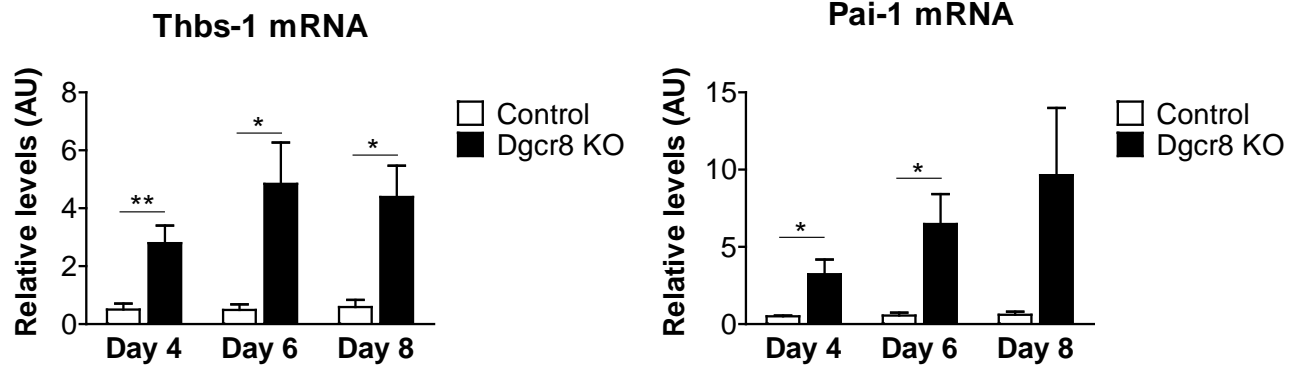

**MB1**

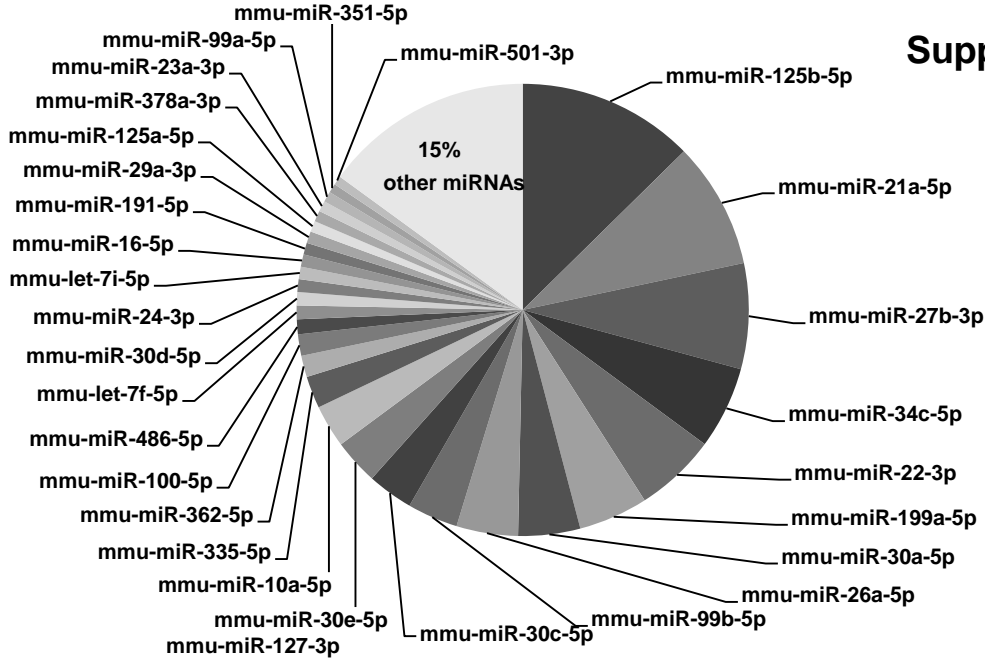

**MB2**

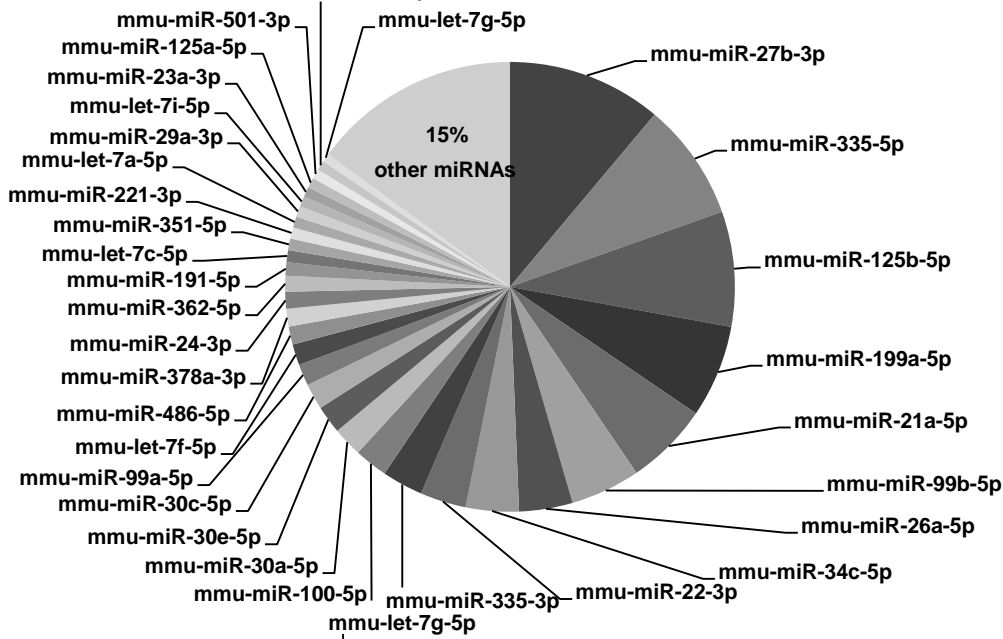

**MB3**

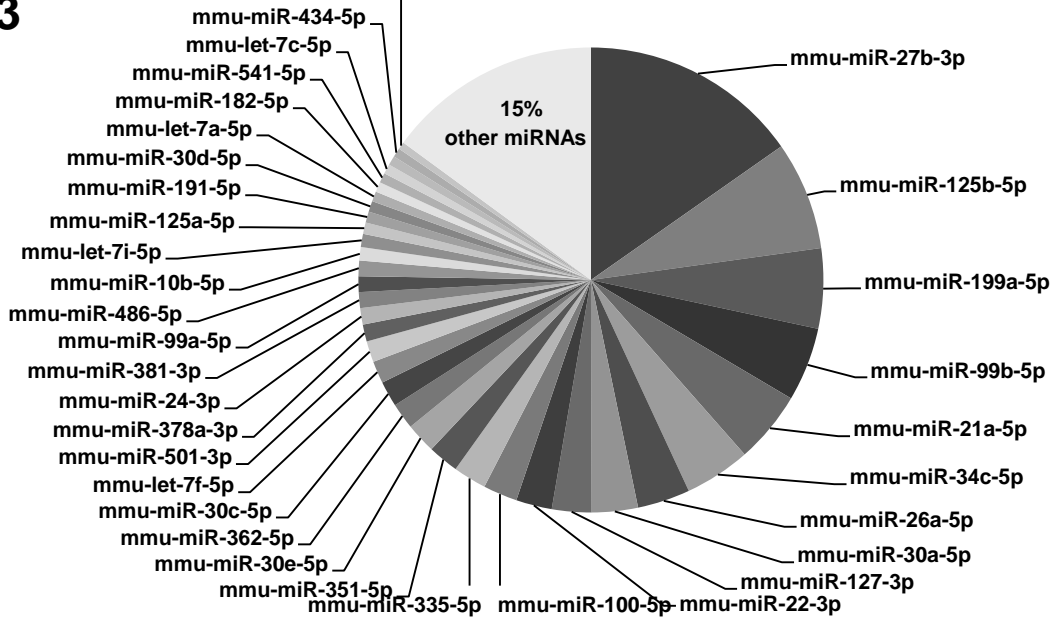

A

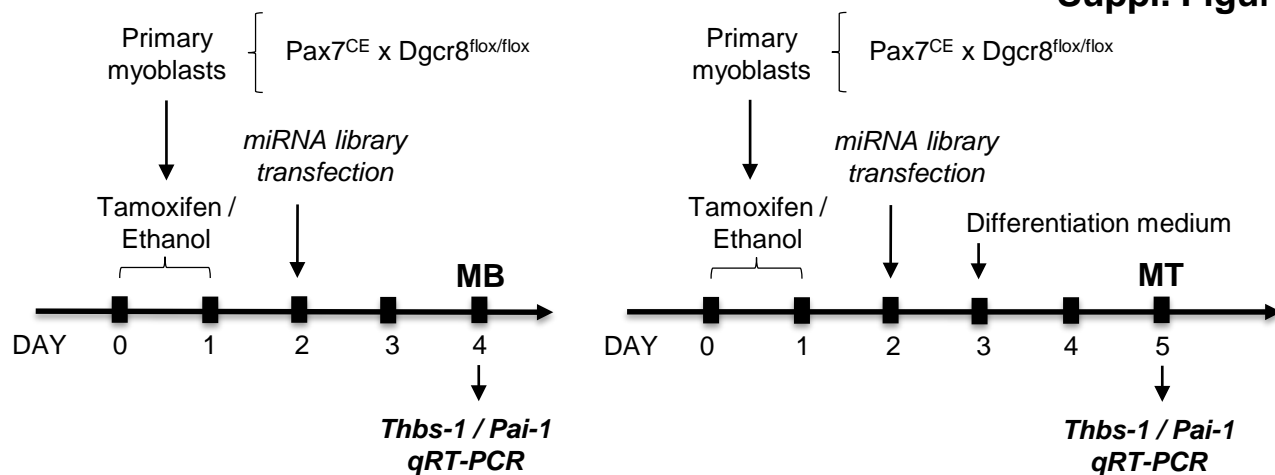

B

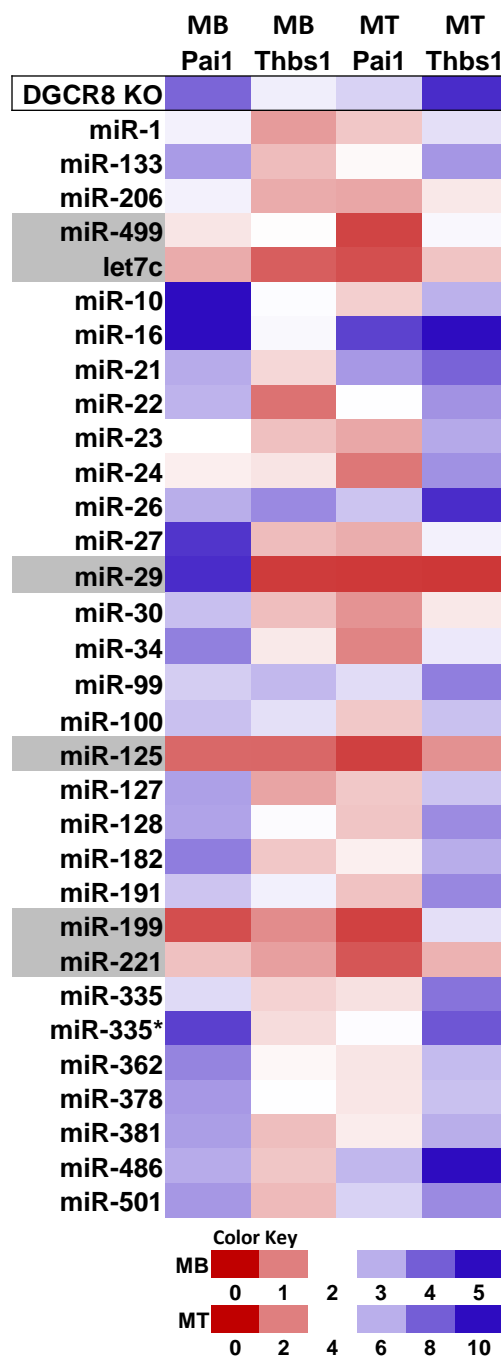

| miRNA       | Human (%) | Mouse (%) |
|-------------|-----------|-----------|
| miR-125b-5p | 8         | 9.5       |
| Let7-5p     | 4.9       | 4.5       |
| miR-29a-3p  | 1.3       | 0.7       |
| miR-221-3p  | 1         | 0.6       |
| miR-199a-5p | 0.6       | 5.7       |
| miR-499-5p  | 0         | 0.2       |

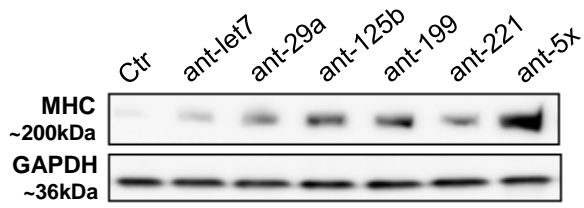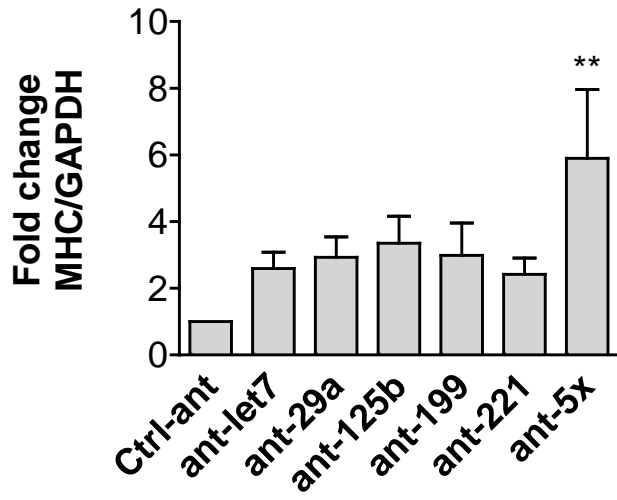

**A**

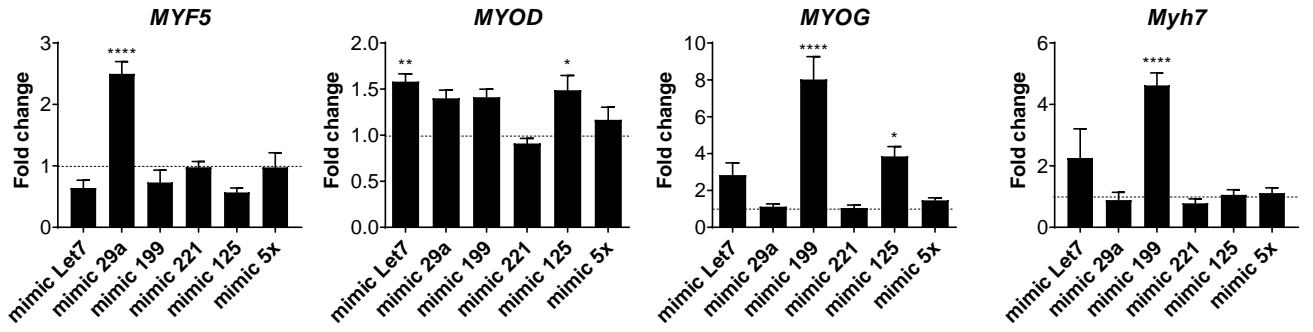

**B**

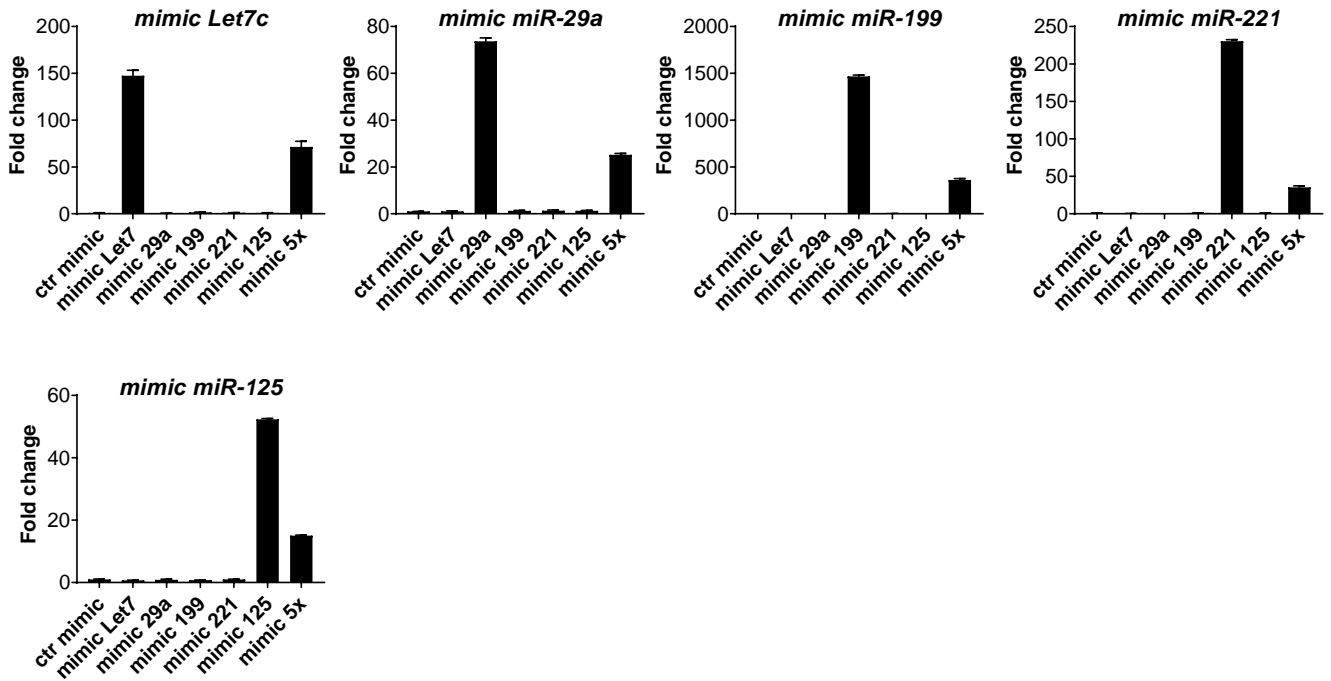

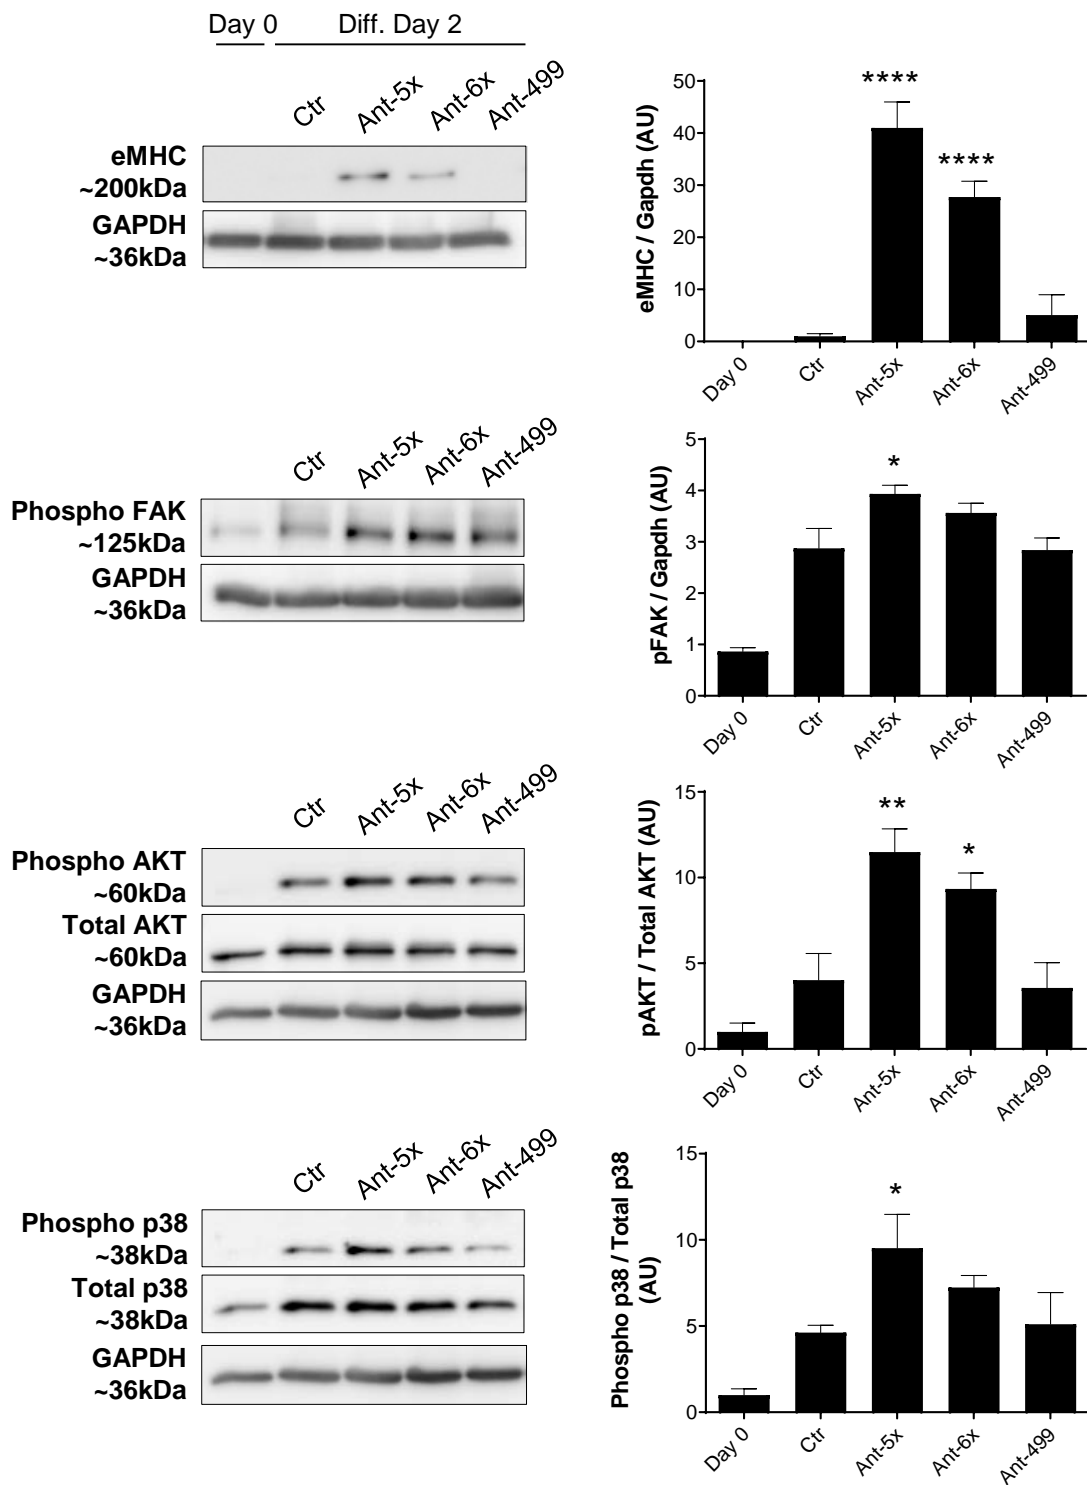



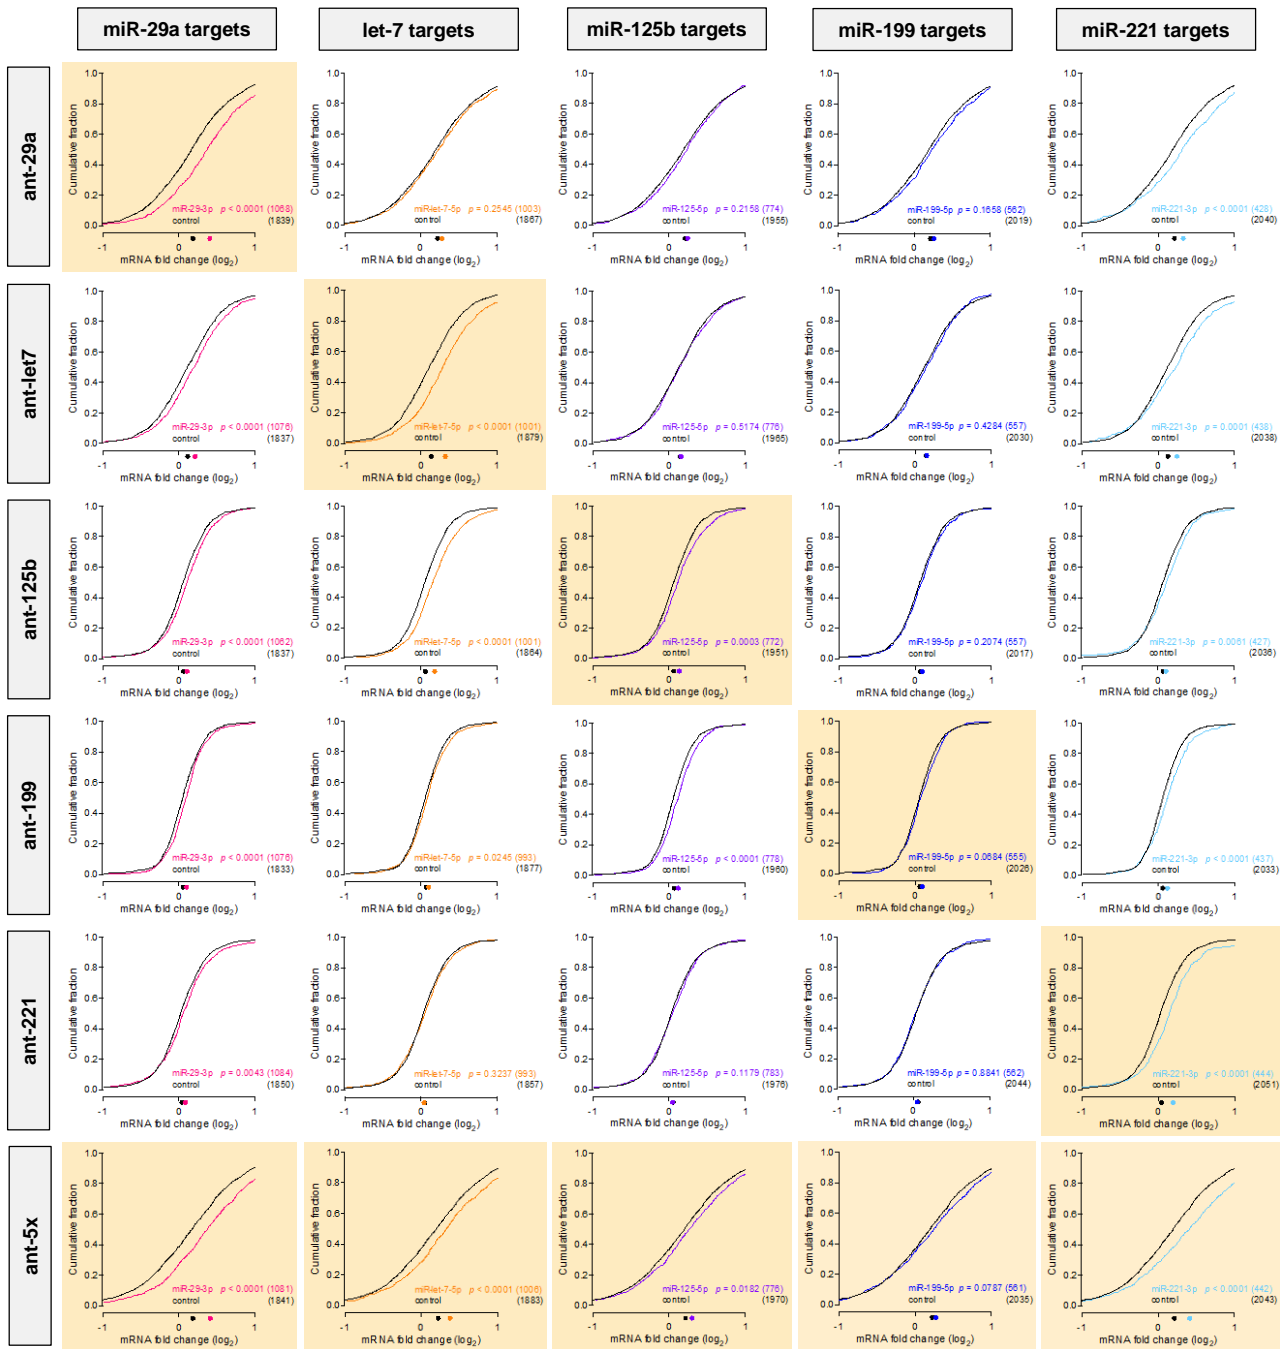

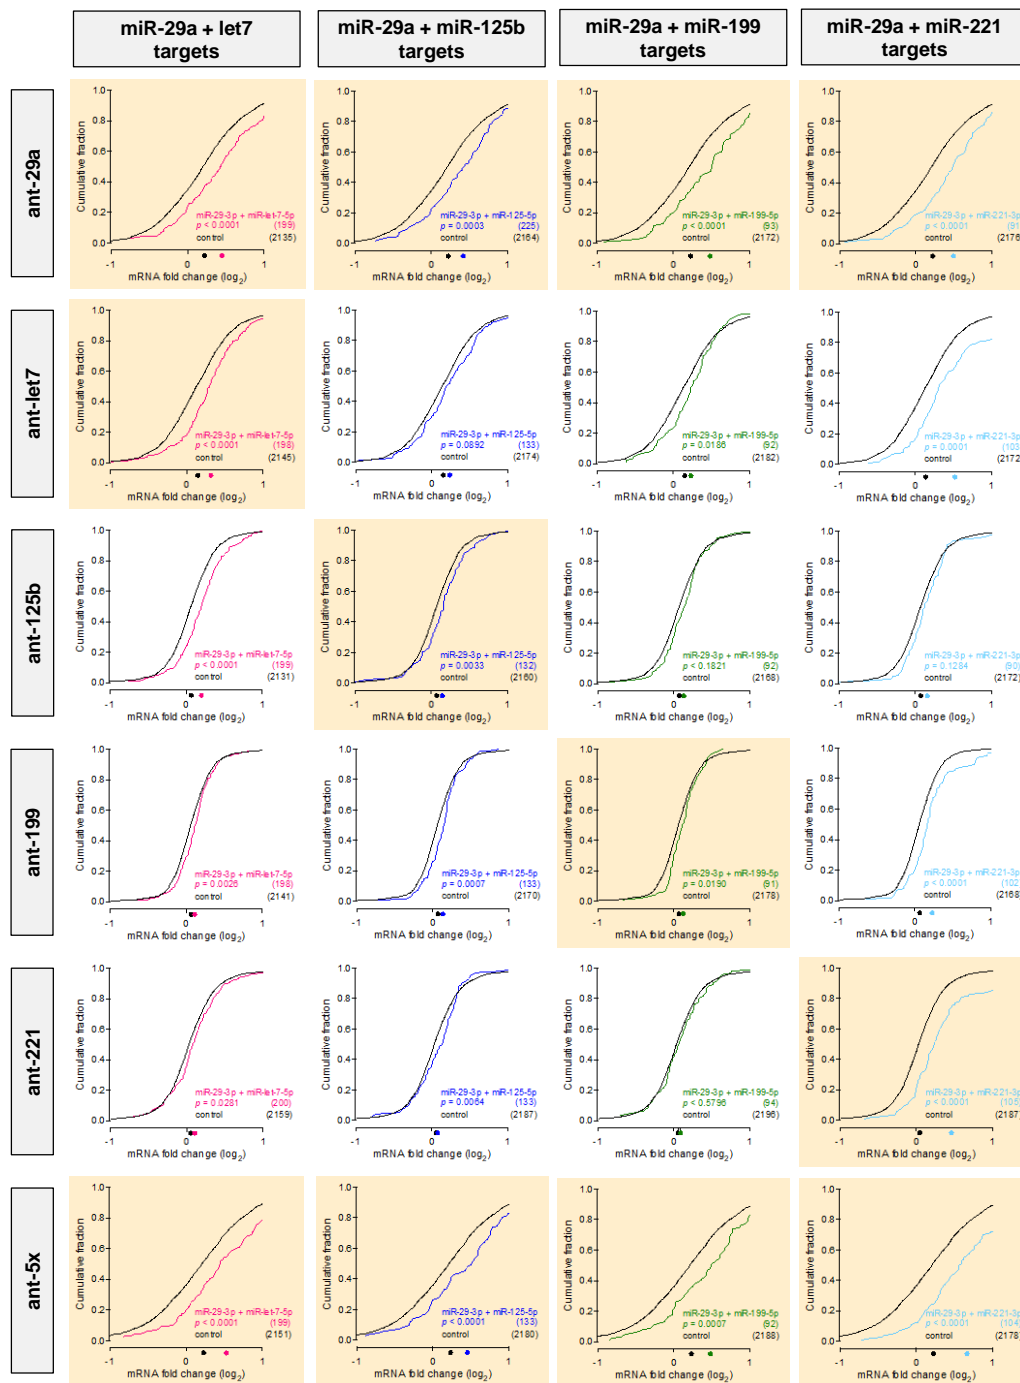

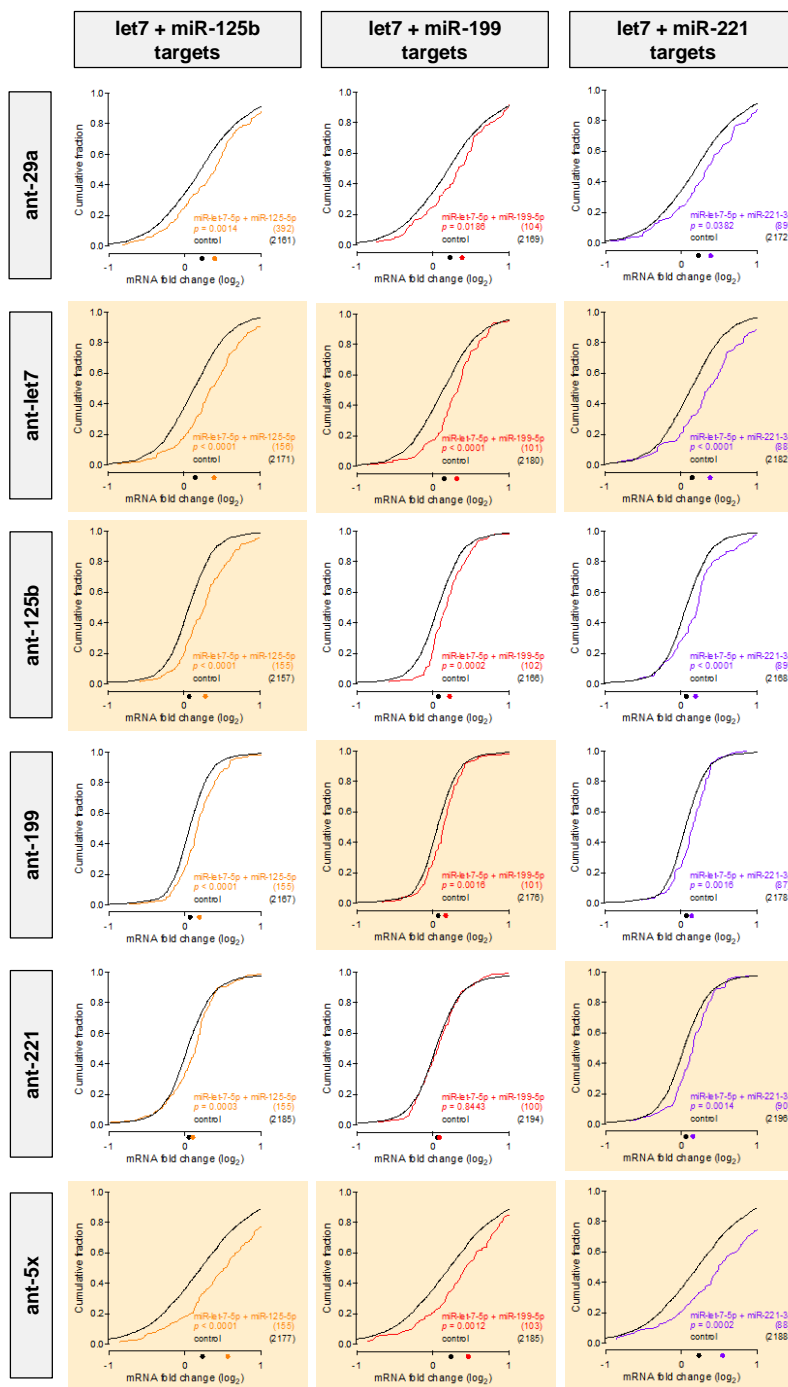

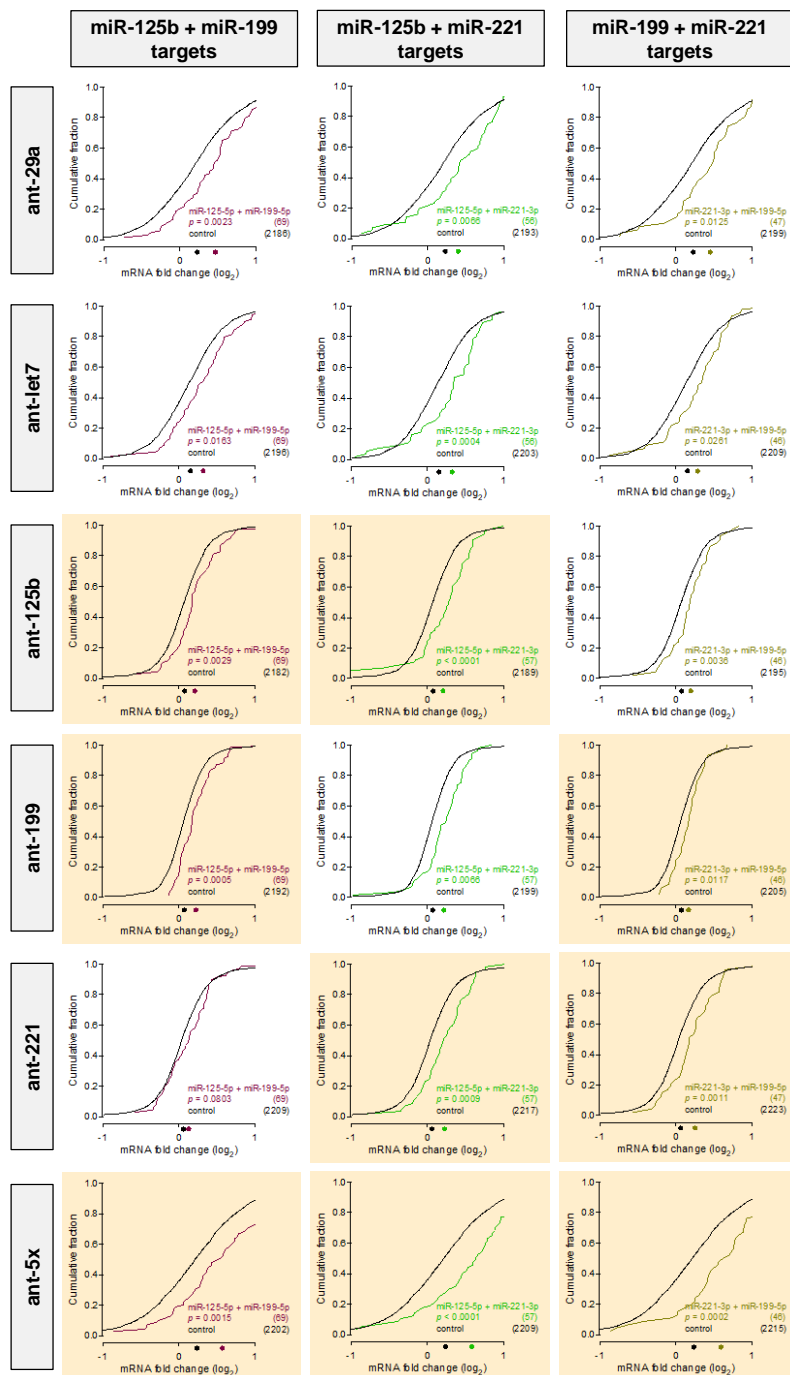

C

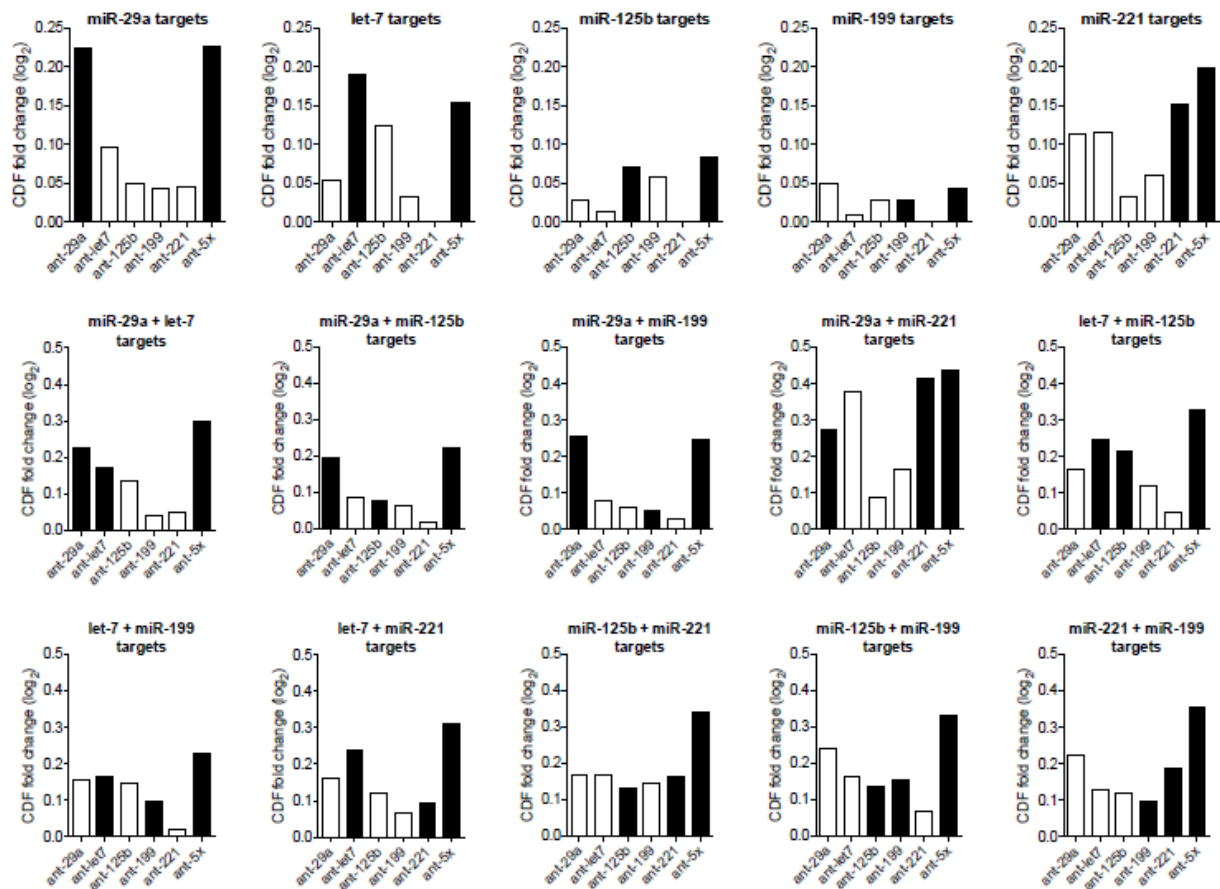

Supplement: mmc1.pdf [file mmc1.pdf]
